# Supplementary material for: Grain Boundary‐Derived Cu+/Cu0 Interfaces in CuO Nanosheets for Low Overpotential Carbon Dioxide Electroreduction to Ethylene
Source: PubMed Central journal article supplement (PMC9313501; doi:10.1002/advs.202200454), 2022-05-22
Supplement: ADVS-9-2200454-s001.pdf [file ADVS-9-2200454-s001.pdf]

## Supporting Information

for *Adv. Sci.*, DOI 10.1002/adv.202200454

Grain Boundary-Derived  $\text{Cu}^+/\text{Cu}^0$  Interfaces in CuO Nanosheets for Low Overpotential Carbon Dioxide Electroreduction to Ethylene

*Jianfang Zhang, Yan Wang\**, Zhengyuan Li, Shuai Xia, Rui Cai, Lu Ma, Tianyu Zhang, Josh Ackley, Shize Yang\*, Yucheng Wu\* and Jingjie Wu\*

## Supporting Information

### **Grain boundary-derived $\text{Cu}^+/\text{Cu}^0$ interfaces in CuO nanosheets for low overpotential $\text{CO}_2$ electroreduction to ethylene**

*Jianfang Zhang, Yan Wang\*, Zhengyuan Li, Shuai Xia, Rui Cai, Lu Ma, Tianyu Zhang, Josh Ackley, Shize Yang\*, Yucheng Wu\*, Jingjie Wu\**

Dr. J. F. Zhang, S. Xia, R. Cai, Dr. Y. Wang, Prof. Y. C. Wu

School of Materials Science and Engineering, Hefei University of Technology, Hefei 230009, China

E-mail: stone@hfut.edu.cn

Prof. Y. C. Wu

China International S&T Cooperation Base for Advanced Energy and Environmental Materials & Anhui Provincial International S&T Cooperation Base for Advanced Energy Materials, Hefei University of Technology, Hefei 230009, China.

E-mail: ycwu@hfut.edu.cn

Dr. J. F. Zhang, Z. Y. Li, T. Y. Zhang, J. Ackley, Prof. J. J. Wu

Department of Chemical and Environmental Engineering, University of Cincinnati, Cincinnati, OH 45221, United States

E-mail: jingjie.wu@uc.edu

Dr. S. Z. Yang

Eyring Materials Center, Arizona State University, Tempe, Arizona 85287, United States

E-mail: [shize.yang@asu.edu](mailto:shize.yang@asu.edu)

Dr. L. Ma

National Synchrotron Light Source II, Brookhaven National Laboratory, Upton, New York, 11971, United States

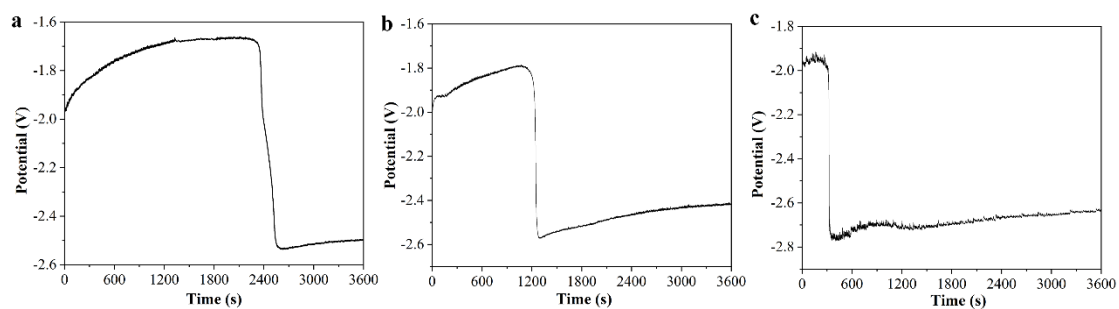

**Figure S1.** The chronopotentiometric E-t curves of the synthesis process for CuO nanosheets at different ultrasonic power. (a) 160 W, (b) 80 W, and (c) 0 W.

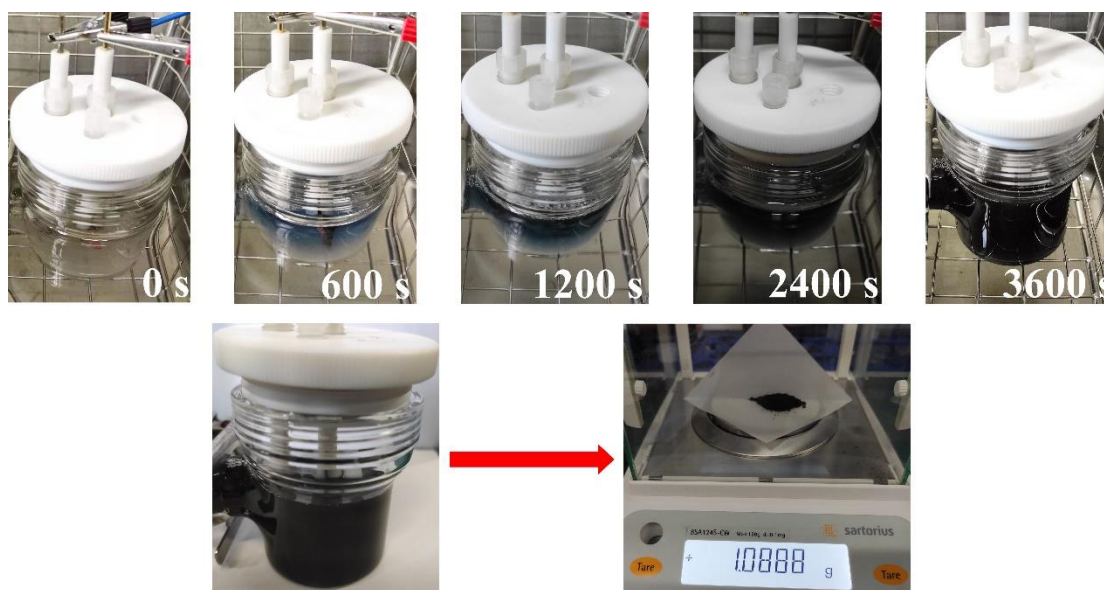

**Figure S2.** Photo images of the color change of KOH electrolyte with the electrodeposition time during the synthesis of CuO-160W nanosheets.

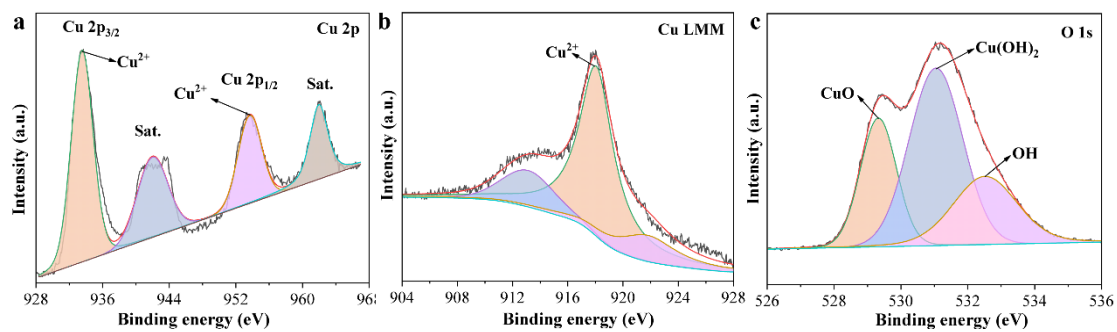

**Figure S3.** XPS spectra of as-prepared CuO-160W nanosheets. (a) Cu 2p, (b) Cu LMM, and (c) O 1s.

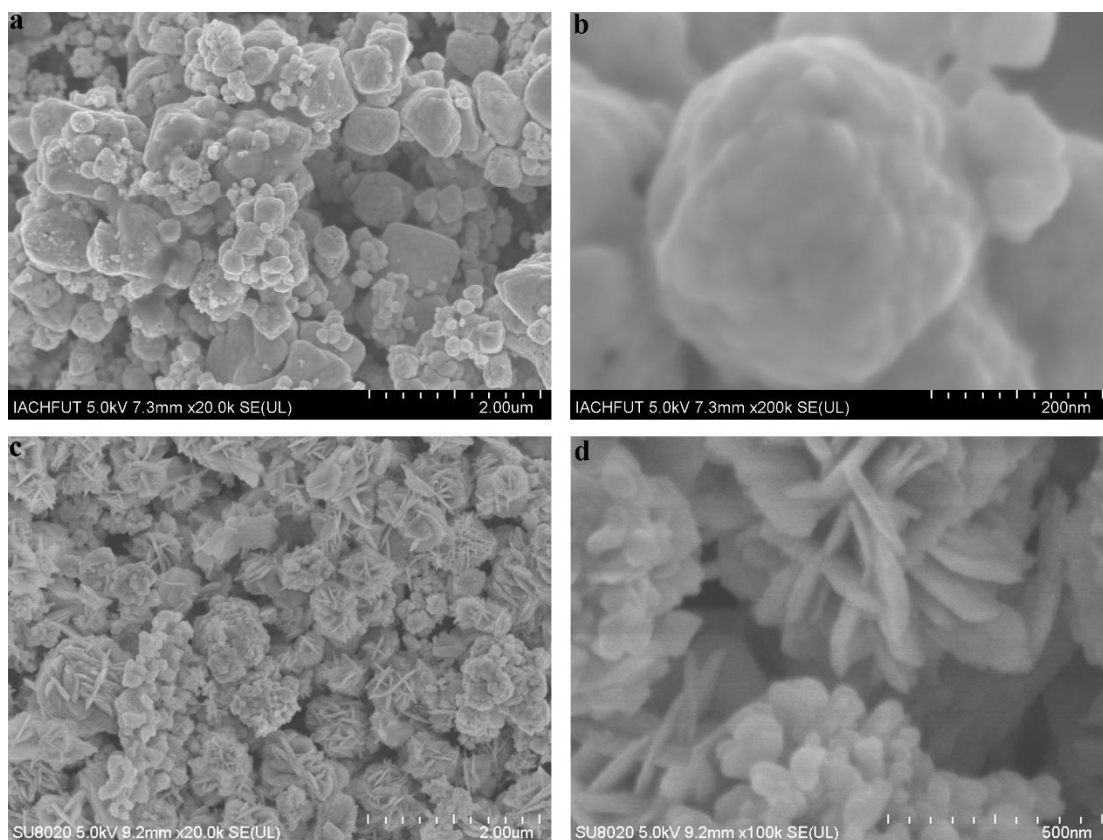

**Figure S4.** SEM images of as-prepared CuO catalysts at different ultrasonic power. (a-b) CuO-0W, and (c-d) CuO-80W.

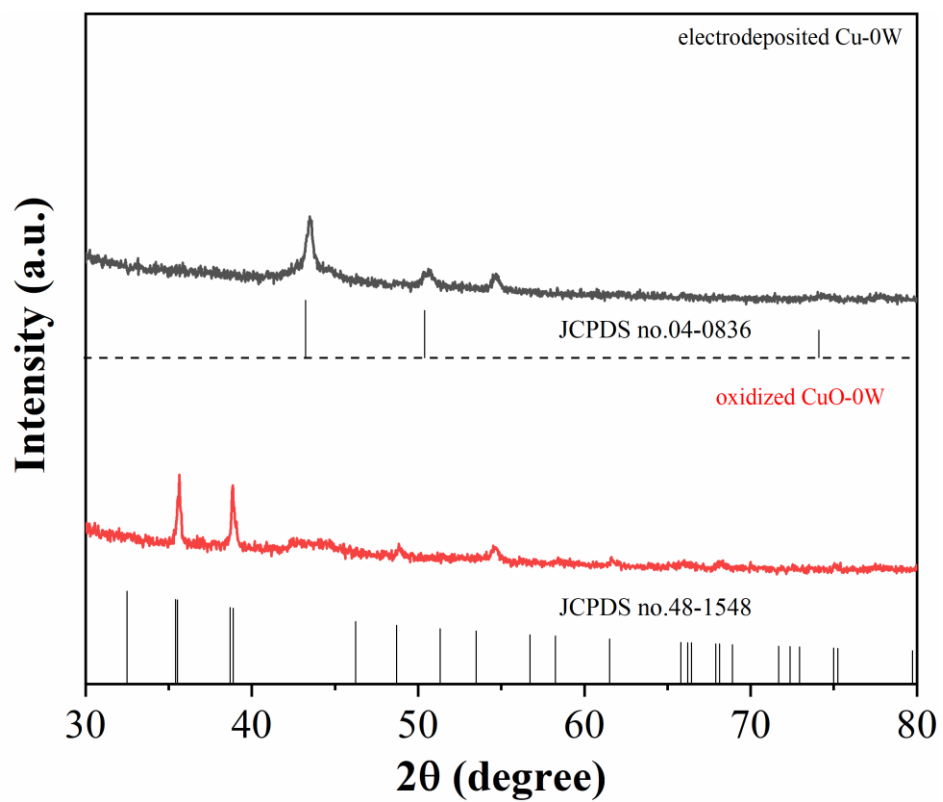

**Figure S5.** XRD patterns of the electrodeposited Cu-0W before and after spontaneous oxidation in KOH solution.

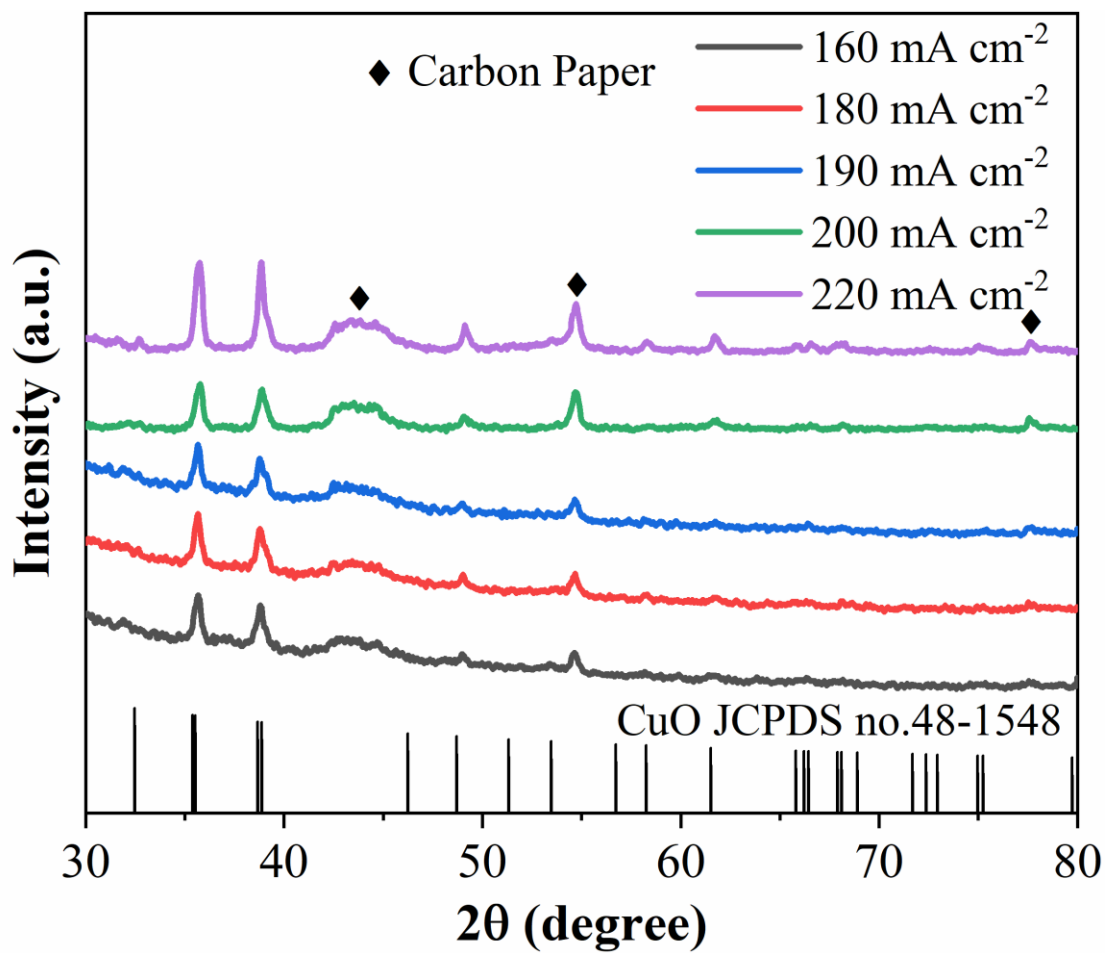

**Figure S6.** XRD patterns of various CuO-160W catalysts prepared under different electrodeposition current densities and a fixed ultrasonic power of 160 W.



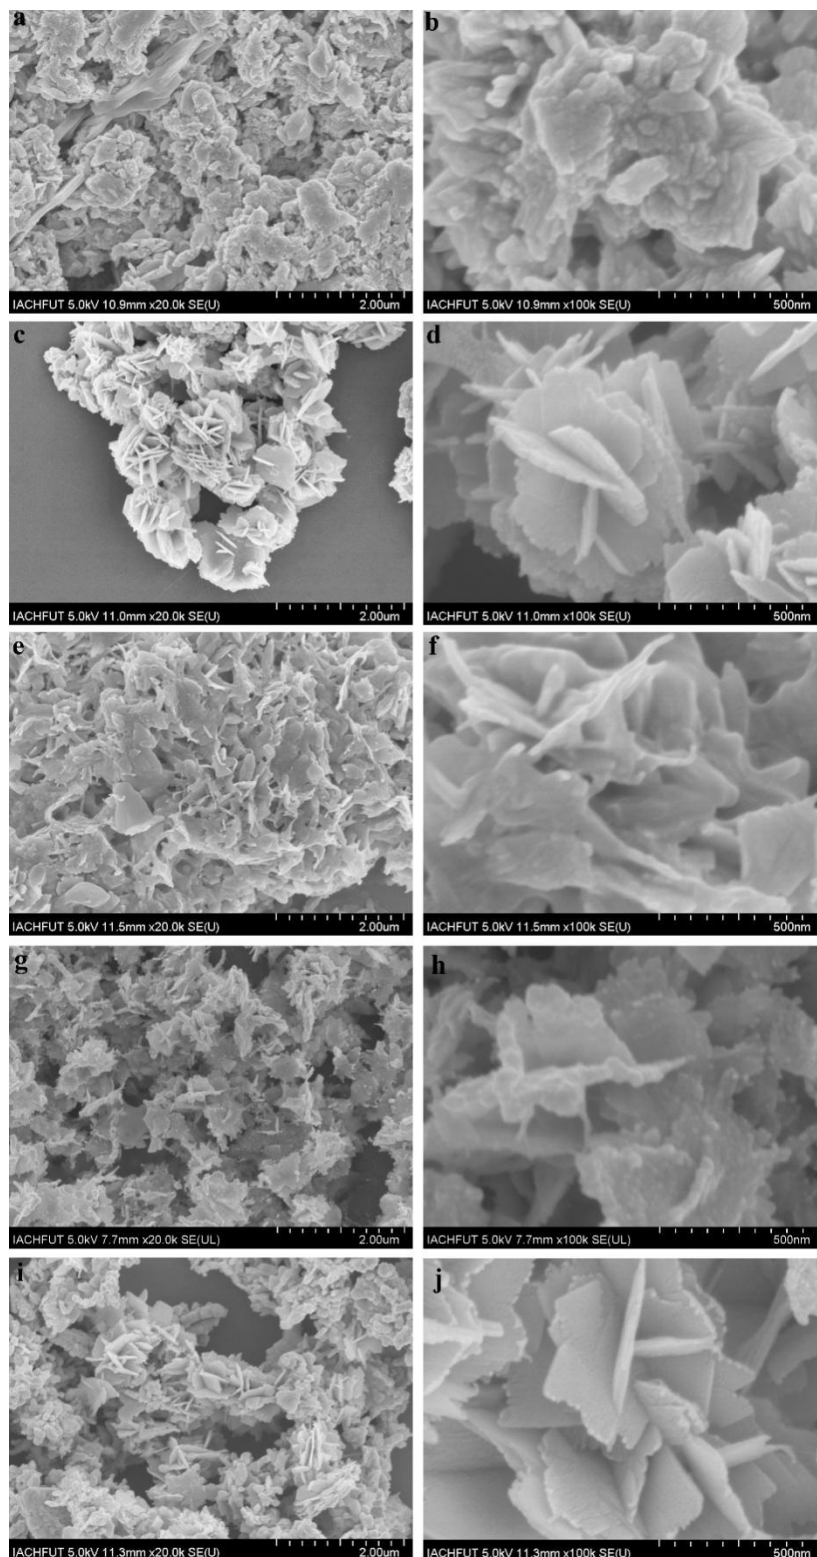

**Figure S7.** SEM images of various CuO-160W catalysts prepared by under different electrodeposition current densities and a fixed ultrasonic power of 160 W. (a,b) 160 mA cm<sup>-2</sup>, (c,d) 180 mA cm<sup>-2</sup>, (e,f) 190 mA cm<sup>-2</sup>, (g,h) 200 mA cm<sup>-2</sup>, and (i, j) 220 mA cm<sup>-2</sup>.

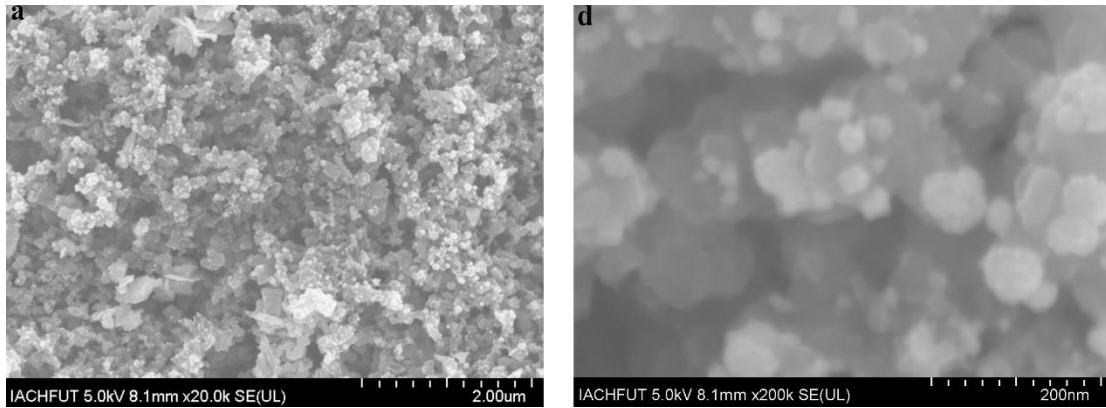

**Figure S8.** SEM images of the electrodeposited Cu on the carbon paper at  $190 \text{ mA cm}^{-2}$  and 160 W.

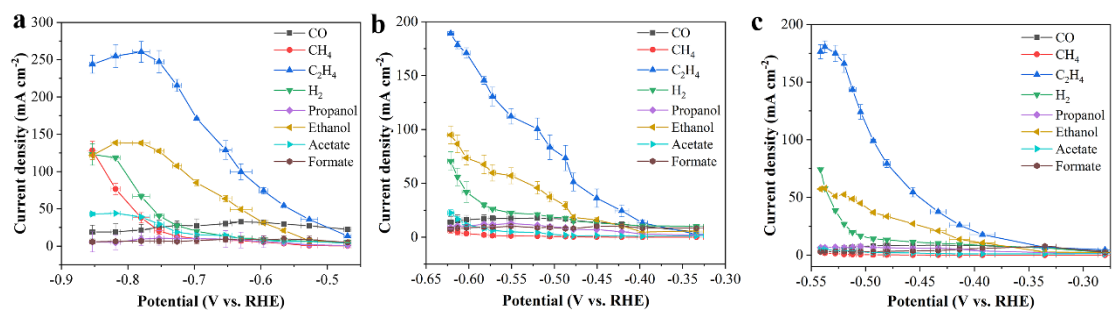

**Figure S9.** The partial current densities of CO<sub>2</sub> reduction products on (a) CuO-0W, (b) CuO-80W, and (c) CuO-160W electrodes.

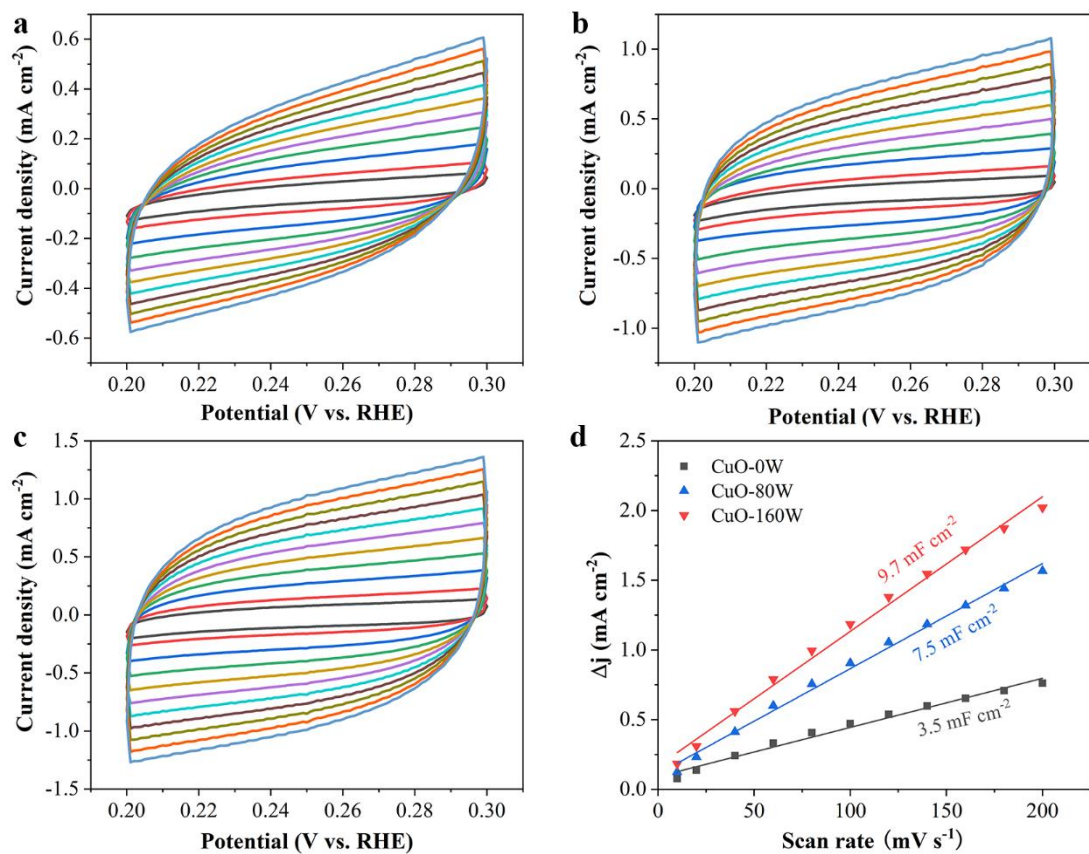

**Figure S10.** Cyclic voltametry (CV) curves of different CuO electrodes at various scan rates from 10 to 200  $\text{mV s}^{-1}$ . (a) CuO-0W, (b) CuO-80W, and (c) CuO-160W, (d) the corresponding  $C_{dl}$  calculated from CV curves.

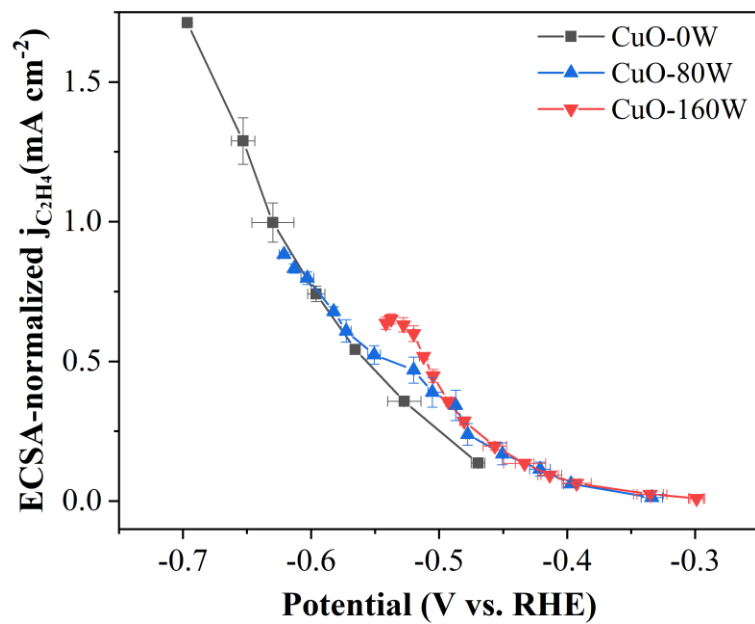

**Figure S11.** ECSA-normalized  $j_{\text{C}_2\text{H}_4}$  of CuO-0W, CuO-80W, and CuO-160W electrodes.

(Note: ECSA=Geometric area (cm<sup>2</sup>) \* RF; where RF is the roughness factor, RF=  $C_{\text{dl}}/C_f$ ,  $C_f$  is 35  $\mu\text{F cm}^{-2}$  for Cu foil)

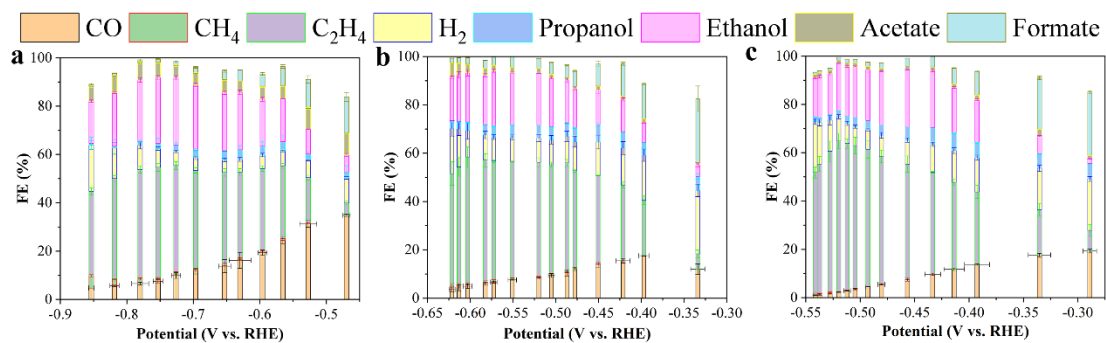

**Figure S12.** The faradaic efficiencies of CO<sub>2</sub> reduction products on (a) CuO-0W, (b) CuO-80W, and (c) CuO-160W electrodes.

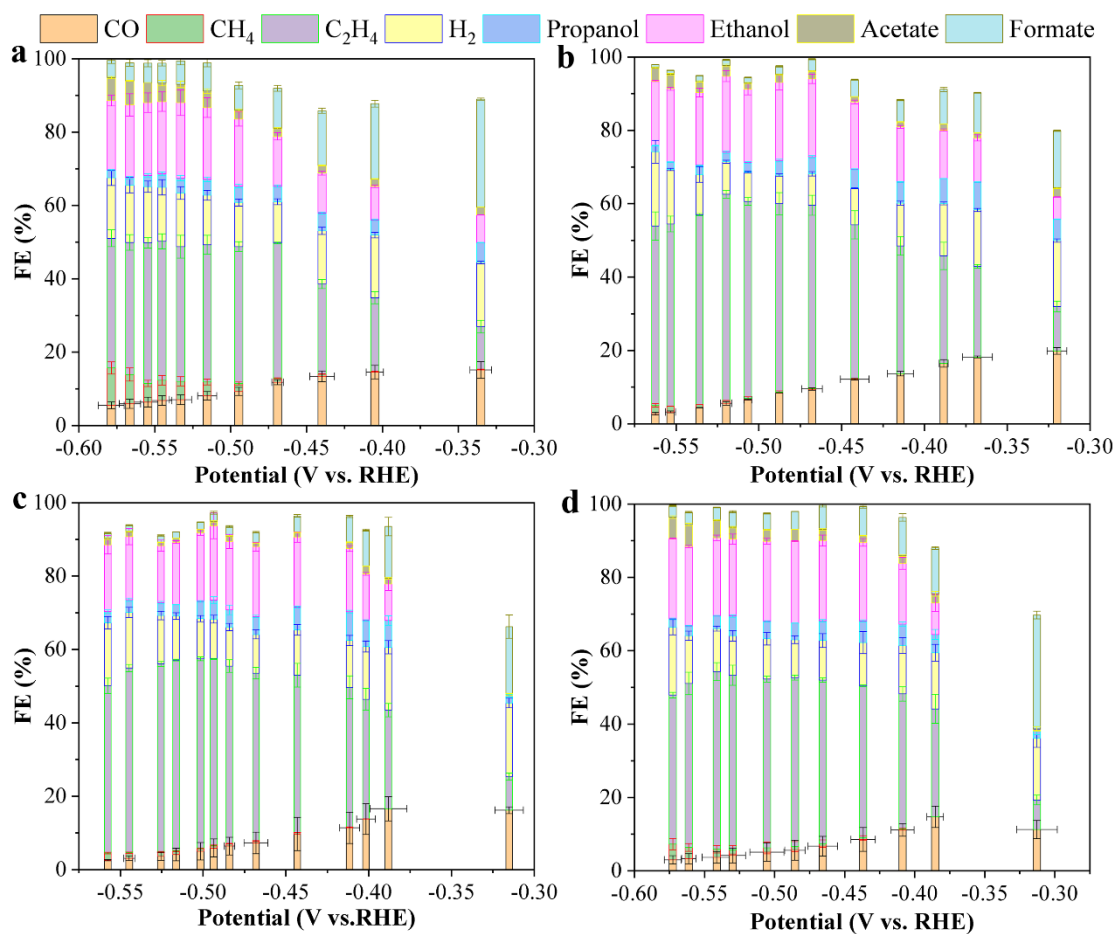

**Figure S13.** The faradaic efficiencies of CO<sub>2</sub> reduction products on CuO-160W electrodes prepared at different electrodeposition current densities. (a) 160 mA cm<sup>-2</sup>, (b) 180 mA cm<sup>-2</sup>, (c) 200 mA cm<sup>-2</sup>, and (d) 220 mA cm<sup>-2</sup>.

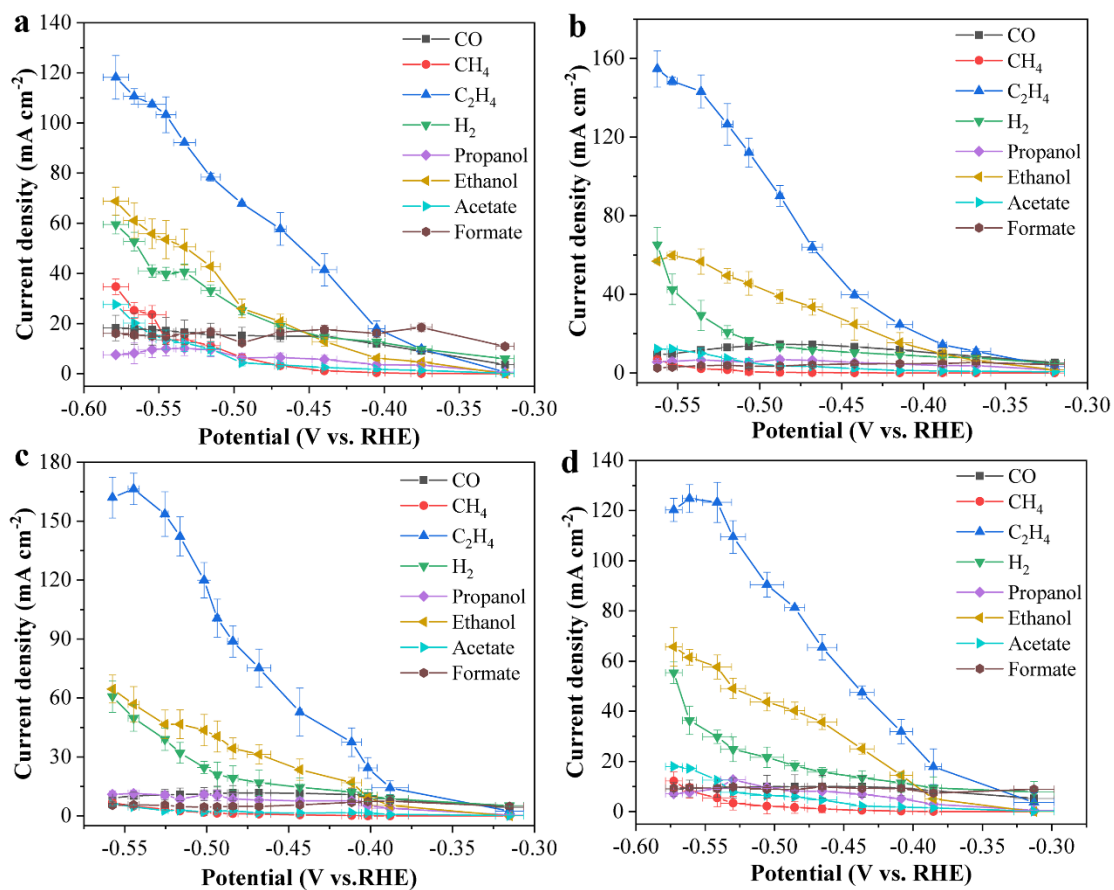

**Figure S14.** The partial current densities of CO<sub>2</sub> reduction products on CuO-160W electrodes prepared at different electrodeposition current densities. (a) 160 mA cm<sup>-2</sup>, (b) 180 mA cm<sup>-2</sup>, (c) 200 mA cm<sup>-2</sup>, and (d) 220 mA cm<sup>-2</sup>.



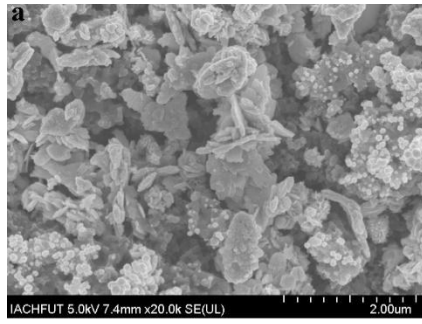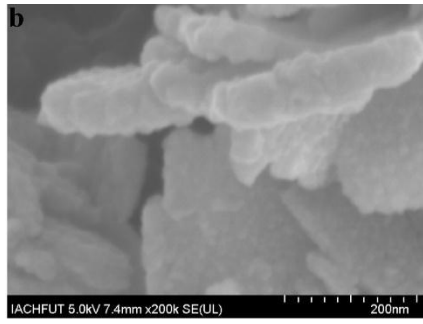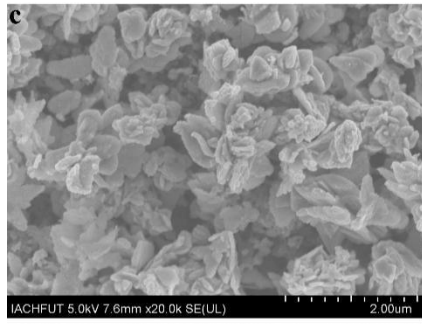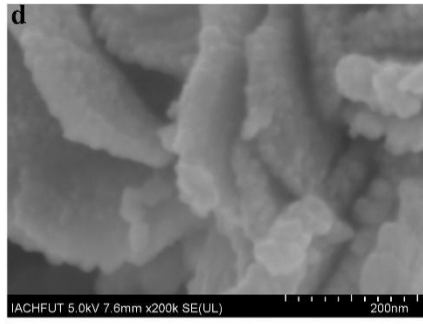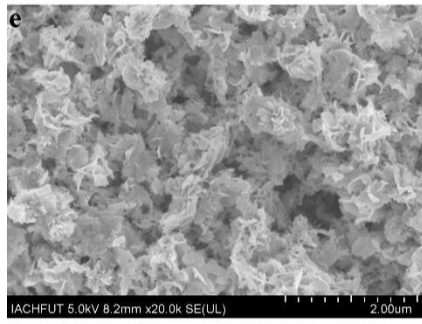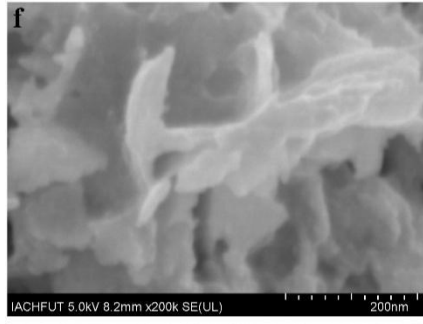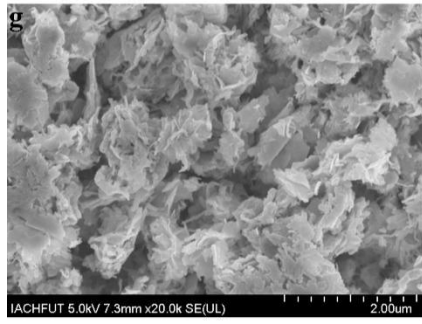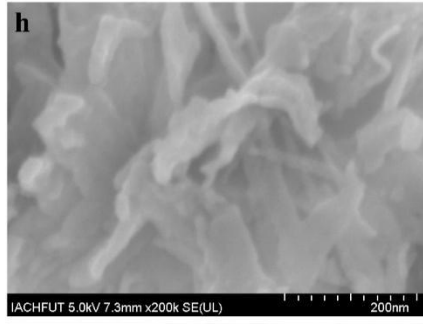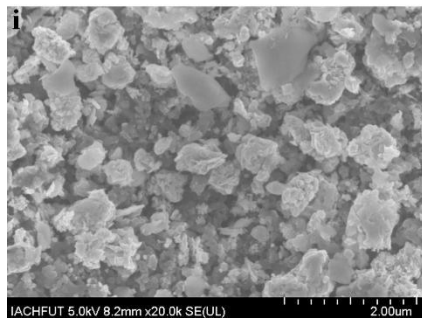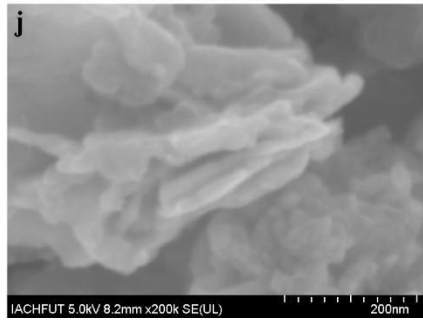

**Figure S15.** SEM images of various CuO-160W catalysts prepared by different electrodeposition current density after eCO<sub>2</sub>RR. (a,b) 160 mA cm<sup>-2</sup>, (c,d) 180 mA cm<sup>-2</sup>, (e,f) 190 mA cm<sup>-2</sup>, (g,h) 200 mA cm<sup>-2</sup>, and (i, j) 220 mA cm<sup>-2</sup>.

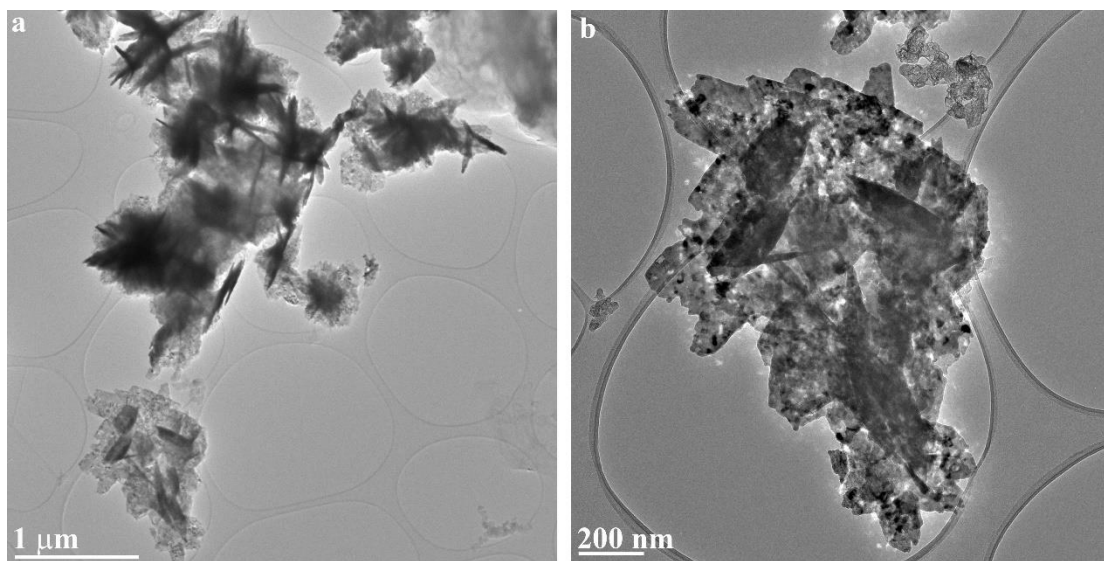

**Figure S16.** TEM images of CuO-160W nanosheets after eCO<sub>2</sub>RR.

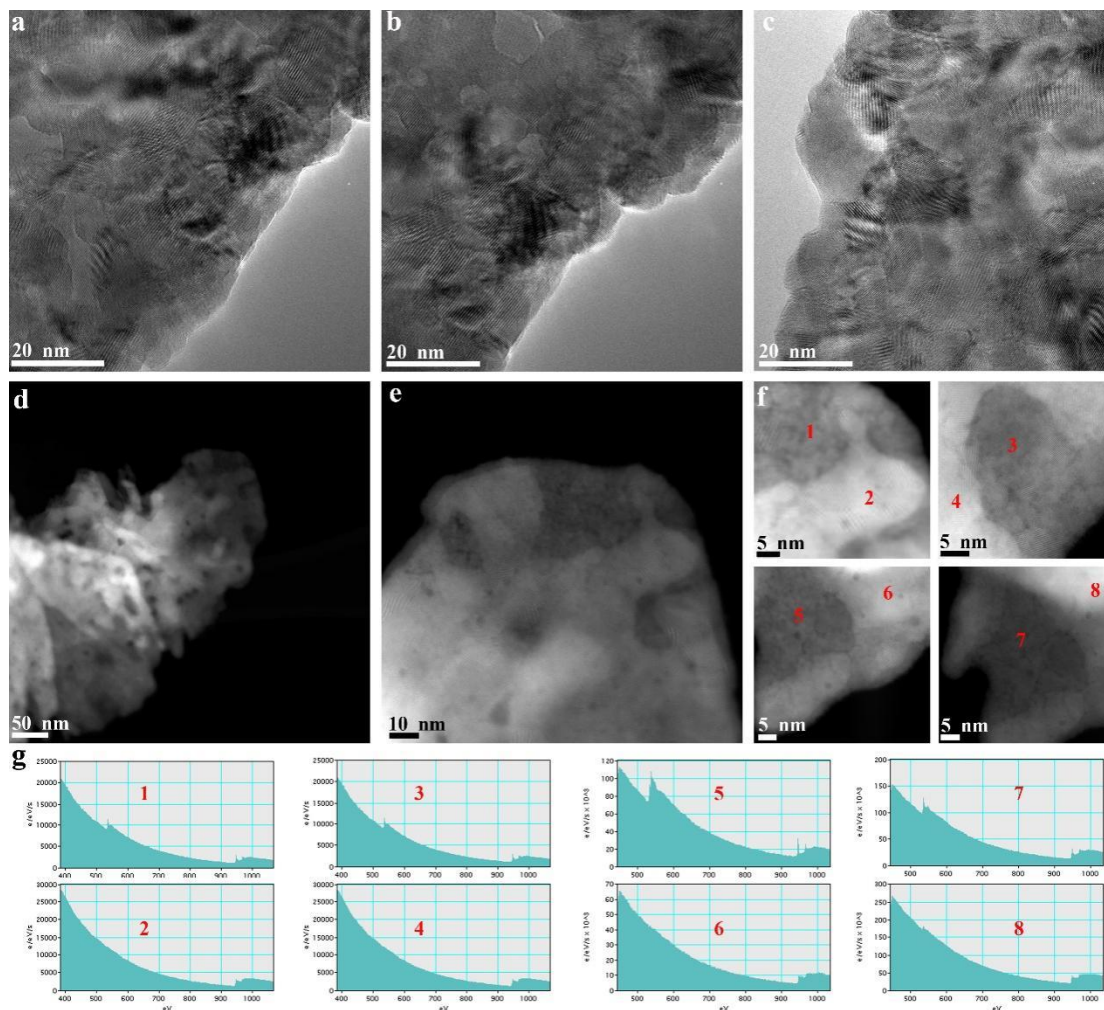

**Figure S17.** Morphological and composition analysis of post CuO-160W after eCO<sub>2</sub>RR. (a-c) HRTEM images, (d-f) HAADF-STEM images, and (g) Corresponding EELS spectra collected from the areas of 1-8 in f.

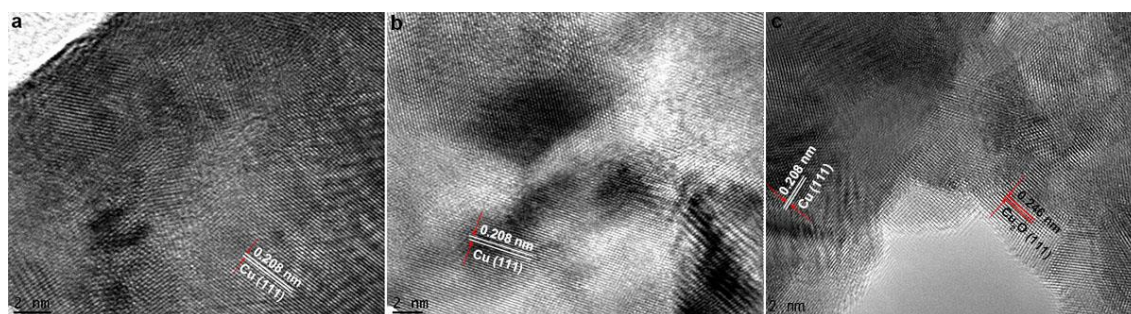

**Figure S18.** HRTEM images of different post CuO samples after eCO<sub>2</sub>RR. (a) CuO-0W, (b) CuO-80W, and (c) CuO-160W.

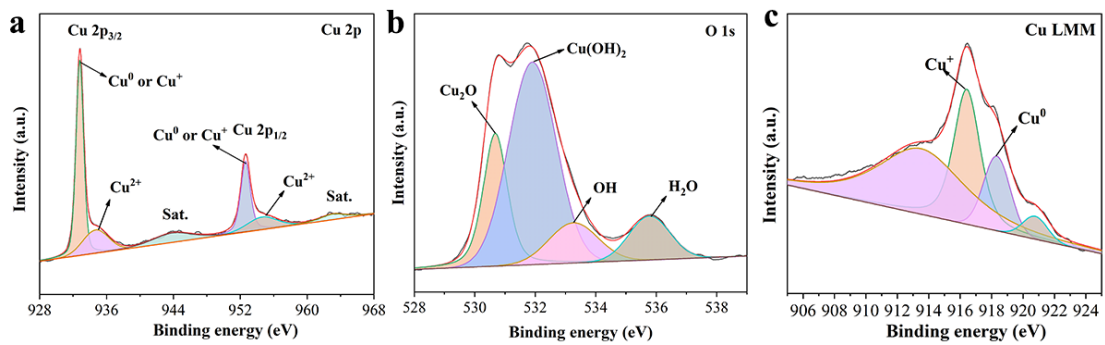

**Figure S19.** XPS spectra of CuO-160W nanosheets after eCO<sub>2</sub>RR. (a) Cu 2p, (b) O1s, and (c) Cu LMM.

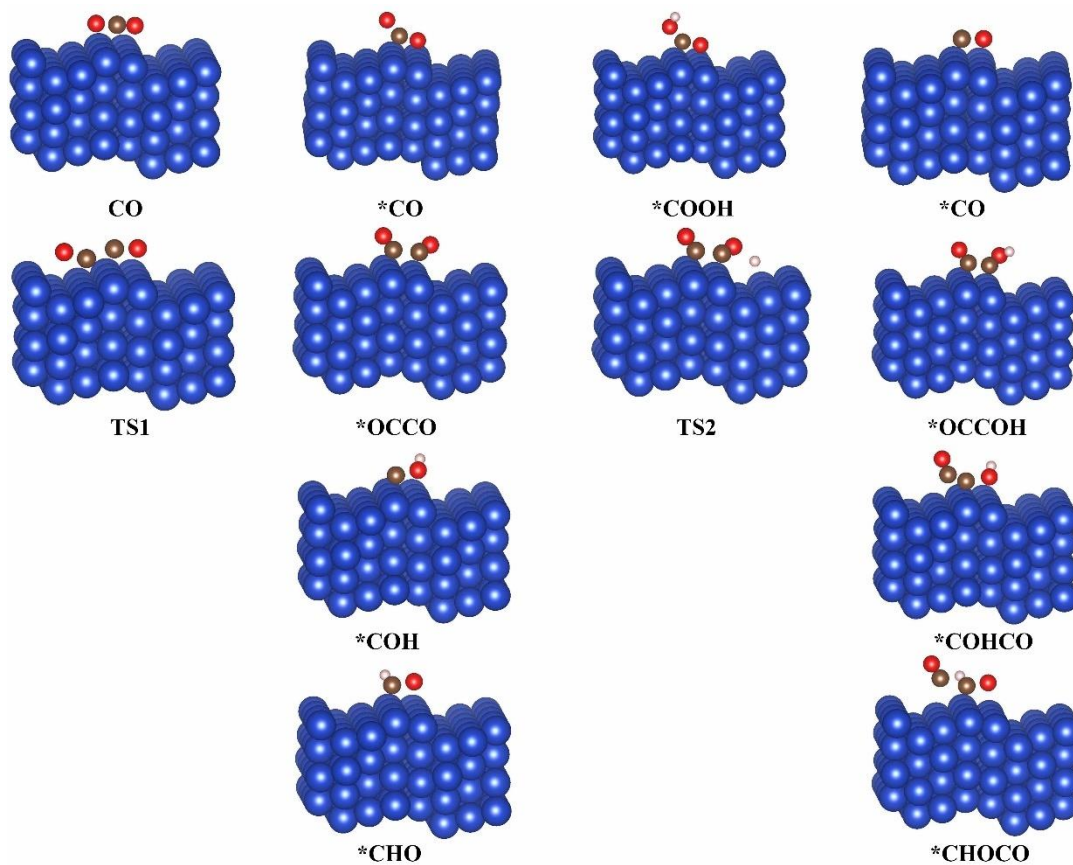

**Figure S20.** Optimized structures for main reaction intermediates on Cu GBs. The blue, grey, red, and white balls represent Cu, O, C and H, respectively.



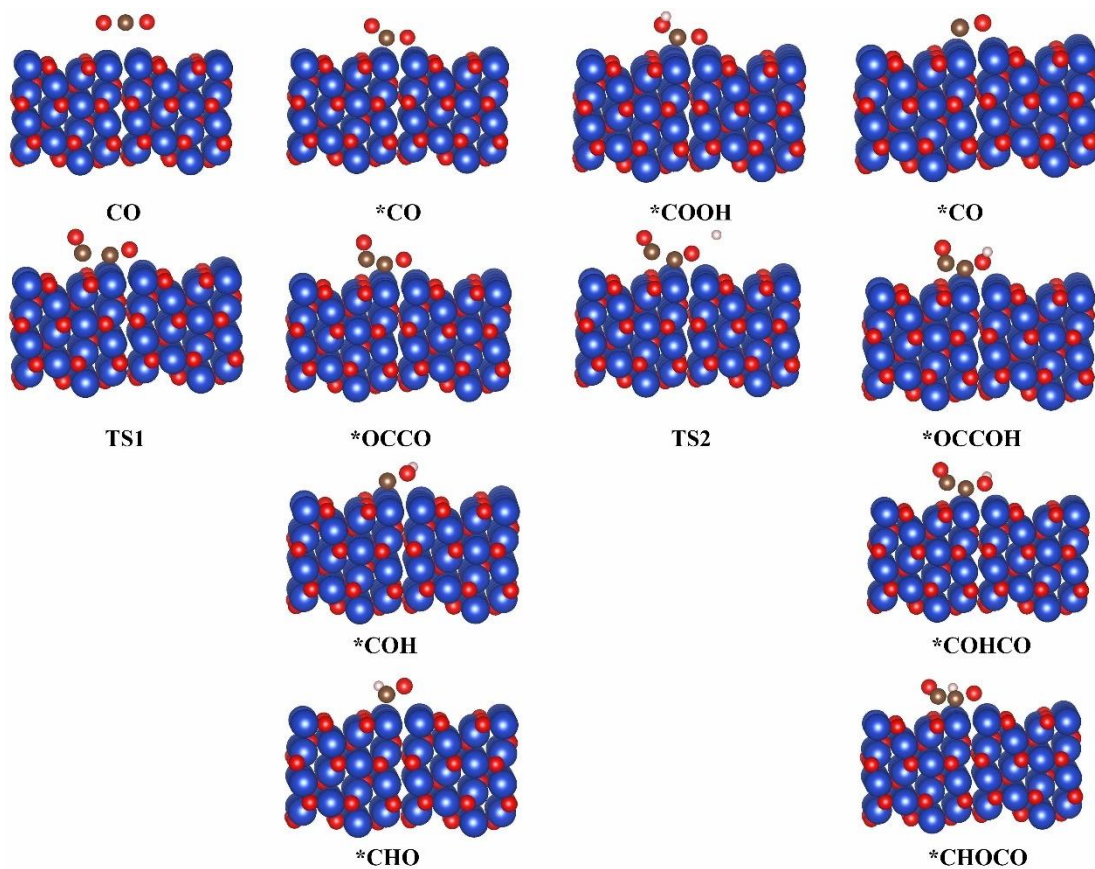

**Figure S21.** Optimized structures for main reaction intermediates on Cu<sub>2</sub>O GBs. The blue, grey, red, and white balls represent Cu, O, C and H, respectively.

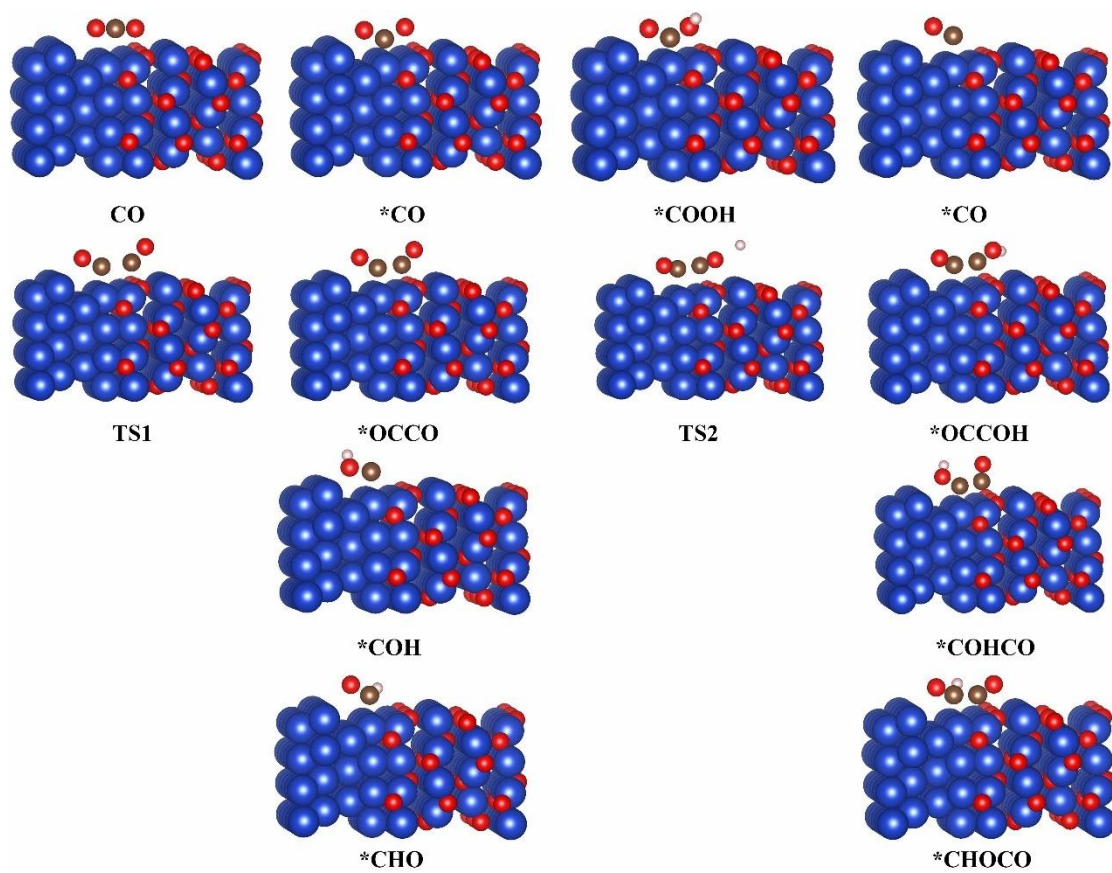

**Figure S22.** Optimized structures for main reaction intermediates on  $\text{Cu}^+/\text{Cu}^0$  interfaces. The blue, grey, red, and white balls represent Cu, O, C and H, respectively.



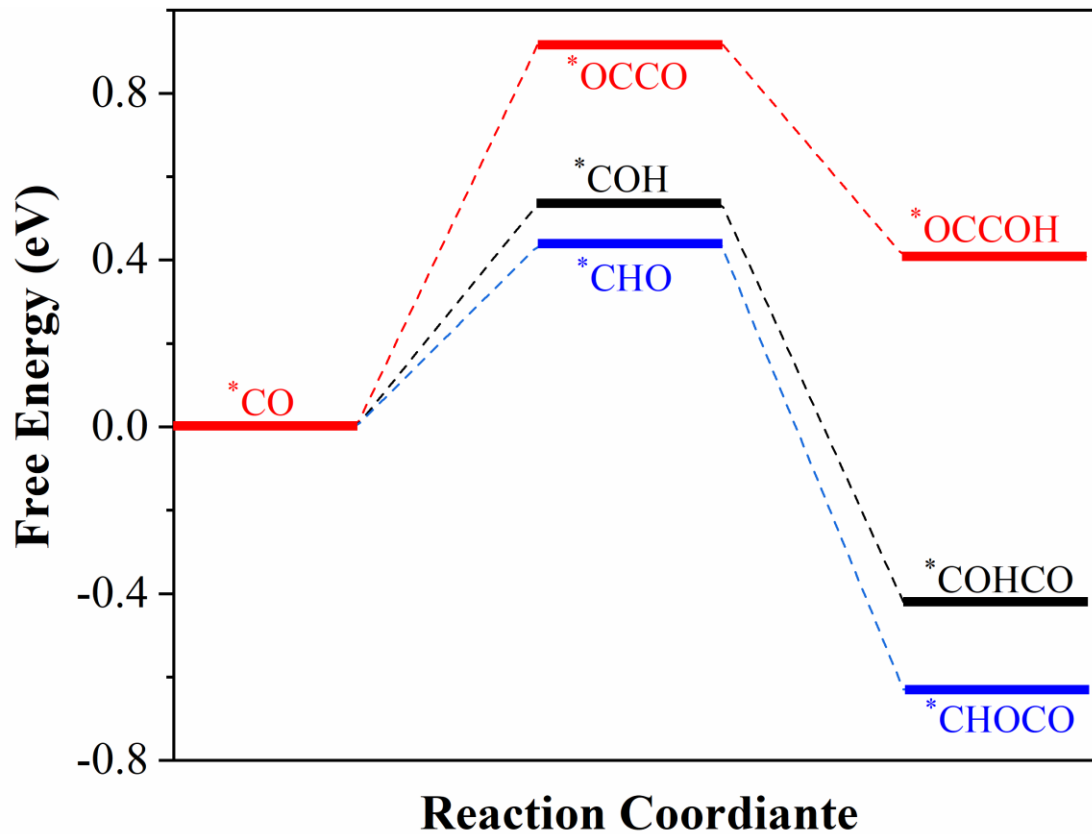

Figure S23. Free energy profiles for the \*OCCO, \*COH, and \*CHO pathway on Cu GBs.

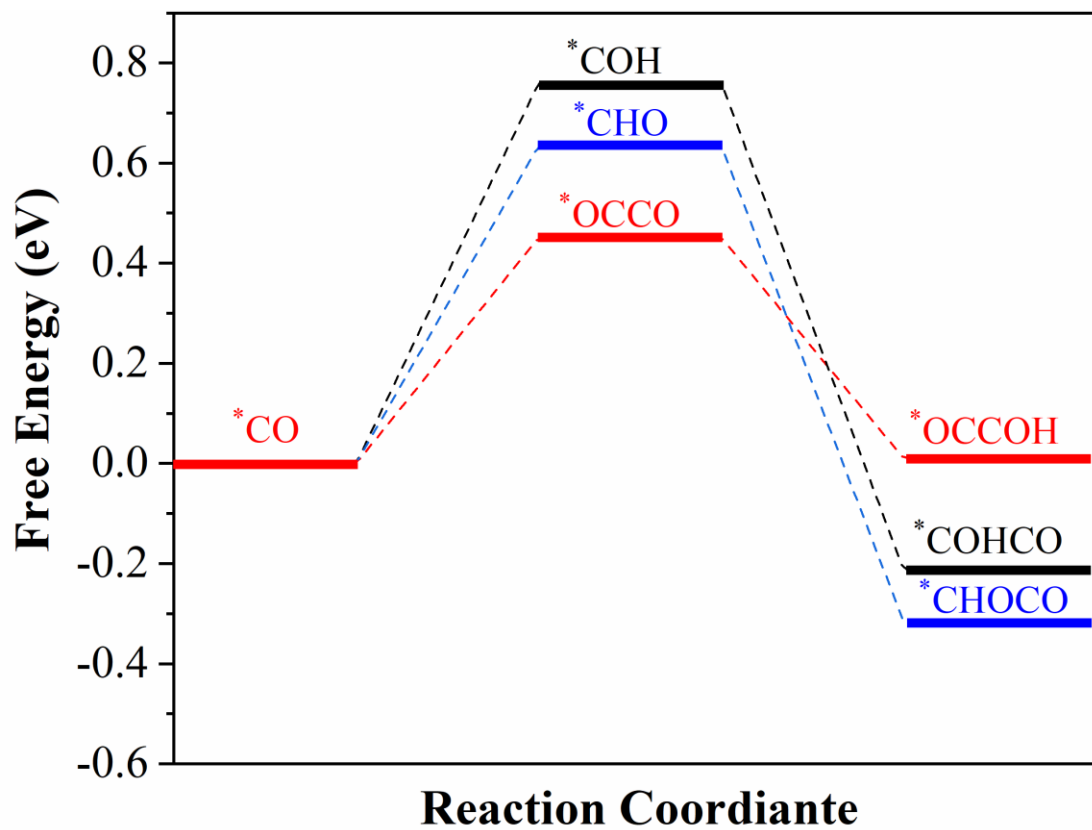

**Figure S24.** Free energy profiles for the  $*OCCO$ ,  $*COH$ , and  $*CHO$  pathway on Cu<sub>2</sub>O GBs.

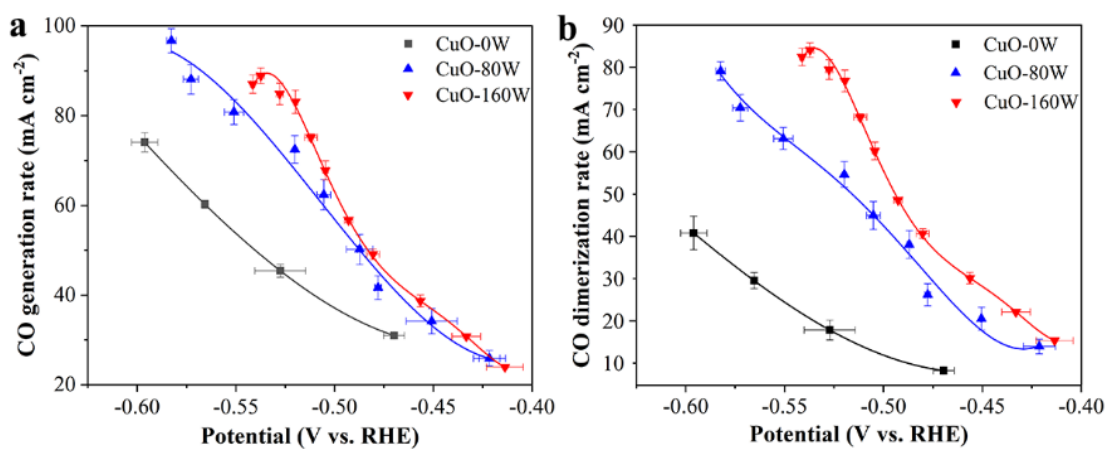

**Figure S25.** (a) CO generation rates and (b) CO dimerization rates of CuO-0W, CuO-80W, and CuO-160W electrodes under various potentials.

The CO generation rate was defined as the summary of the production rates of C<sub>2+</sub> products, CH<sub>4</sub> and CO gas products and calculated by the following equation:

$$j_{\text{CO, generation}} = j_{\text{CO}} + \frac{j_{\text{CH}_4}}{4} + \frac{j_{\text{C}_2\text{H}_4}}{3} + \frac{j_{\text{C}_2\text{H}_5\text{OH}}}{3} + \frac{j_{\text{C}_3\text{H}_7\text{OH}}}{3} + \frac{j_{\text{CH}_3\text{COOH}}}{2}$$

The CO dimerization was normalized from the production rates of C<sub>2+</sub> products.

$$j_{\text{CO, dimerization}} = \frac{j_{\text{C}_2\text{H}_4}}{3} + \frac{j_{\text{C}_2\text{H}_5\text{OH}}}{3} + \frac{j_{\text{C}_3\text{H}_7\text{OH}}}{3} + \frac{j_{\text{CH}_3\text{COOH}}}{2}$$

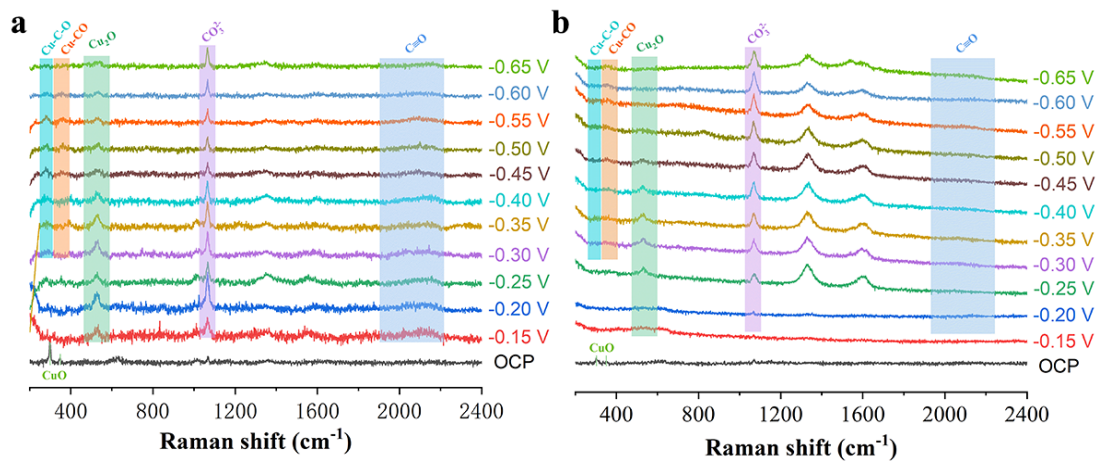

**Figure S26.** *In-situ* Raman spectra of (a) CuO-80W and (b) CuO-0W electrodes under different potentials for 10 min at each potential

**Table S1.** The comparison of performance among various Cu-based catalysts for CO<sub>2</sub> reduction to C<sub>2</sub>H<sub>4</sub>.

| Catalyst                        | electrolyte                          | Potential (V) | FE <sub>C<sub>2</sub>H<sub>4</sub></sub> (%) | j <sub>C<sub>2</sub>H<sub>4</sub></sub> (mA cm <sup>-2</sup> ) | CEE <sub>C<sub>2</sub>H<sub>4</sub></sub> (%) | Ref.      |
|---------------------------------|--------------------------------------|---------------|----------------------------------------------|----------------------------------------------------------------|-----------------------------------------------|-----------|
| CuO nanosheets                  | 1.0 M KOH                            | -0.52         | 62.5                                         | 173                                                            | 41                                            | This work |
| Cu-Al alloy                     | 1.0 M KOH                            | -1.5          | 80                                           | 400                                                            | 34                                            | 1         |
| molecules-Cu-12                 | 1.0 M KHCO <sub>3</sub>              | -0.83         | 72                                           | 230                                                            | 40                                            | 2         |
| polyamine-Cu                    | 1.0 M KOH                            | -0.97         | 72                                           | 312                                                            | 37                                            | 3         |
| Cu-CO <sub>2</sub>              | 7.0 M KOH                            | -0.67         | 70                                           | 217                                                            | 42                                            | 4         |
| CuAg wires                      | 1.0 M KOH                            | -0.70         | 60                                           | 180                                                            | 27                                            | 5         |
| Cu hollow spheres               | 1.0 M KOH                            | -0.9          | 61.1                                         | 143                                                            | 33                                            | 6         |
| Cu nanoparticles                | 1.0 M KOH                            | -0.78         | 46                                           | 150                                                            | 26                                            | 7         |
| Dendritic Copper                | 0.1 M KBr                            | -1.1          | 57                                           | 170                                                            | 28                                            | 8         |
| CuDAT wire                      | 1.0 M KOH                            | -0.6          | 40                                           | 78                                                             | 25                                            | 9         |
| Cu <sub>2</sub> O nanoparticles | 0.1 M KHCO <sub>3</sub>              | -1.1          | 57.3                                         | 11                                                             | 28                                            | 10        |
| Cu nanosheets                   | 0.1 M K <sub>2</sub> SO <sub>4</sub> | -1.18         | 83.2                                         | 66.5                                                           | 39                                            | 11        |
| Cu nanoparticles                | 0.1 M KHCO <sub>3</sub>              | -1.1          | 45                                           | 15.7                                                           | 22                                            | 12        |
| plasma activated Cu             | 0.1 M KHCO <sub>3</sub>              | -0.9          | 60                                           | 12                                                             | 32                                            | 13        |

## References:

- [1] M. Zhong, K. Tran, Y. Min, C. Wang, Z. Wang, C. T. Dinh, P. De Luna, Z. Yu, A. S. Rasouli, P. Brodersen, S. Sun, O. Voznyy, C. S. Tan, M. Askerka, F. Che, M. Liu, A. Seifitokaldani, Y. Pang, S. C. Lo, A. Ip, Z. Ulissi, E. H. Sargent, *Nature* **2020**, *581*, 178.
- [2] F. Li, A. Thevenon, A. Rosas-Hernandez, Z. Wang, Y. Li, C. M. Gabardo, A. Ozden, C. T. Dinh, J. Li, Y. Wang, J. P. Edwards, Y. Xu, C. McCallum, L. Tao, Z. Q. Liang, M. Luo, X. Wang, H. Li, C. P. O'Brien, C. S. Tan, D. H. Nam, R. Quintero-Bermudez, T. T. Zhuang, Y. C. Li, Z. Han, R. D. Britt, D. Sinton, T. Agapie, J. C. Peters, E. H. Sargent, *Nature* **2020**, *577*, 509.
- [3] X. Chen, J. Chen, N. M. Alghoraibi, D. A. Henckel, R. Zhang, U. O. Nwabara, K. E. Madsen, P. J. A. Kenis, S. C. Zimmerman, A. A. Gewirth, *Nat. Catal.* **2020**, *4*, 20.
- [4] Y. Wang, Z. Wang, C.-T. Dinh, J. Li, A. Ozden, M. Golam Kibria, A. Seifitokaldani, C.-S. Tan, C. M. Gabardo, M. Luo, H. Zhou, F. Li, Y. Lum, C. McCallum, Y. Xu, M. Liu, A. Proppe, A. Johnston, P.

- Todorovic, T.-T. Zhuang, D. Sinton, S. O. Kelley, E. H. Sargent, *Nat. Catal.* **2019**, *3*, 98.
- [5] T. T. H. Hoang, S. Verma, S. Ma, T. T. Fister, J. Timoshenko, A. I. Frenkel, P. J. A. Kenis, A. A. Gewirth, *J. Am. Chem. Soc.* **2018**, *140*, 5791.
- [6] R.-X. Yang, Y.-R. Wang, G.-K. Gao, L. Chen, Y. Chen, S.-L. Li, Y.-Q. Lan, *Small Struct.* **2021**, *2*, 2100012.
- [7] S. Ma, M. Sadakiyo, R. Luo, M. Heima, M. Yamauchi, P. J. A. Kenis, *J. Power Sources* **2016**, *301*, 219.
- [8] C. Reller, R. Krause, E. Volkova, B. Schmid, S. Neubauer, A. Rucki, M. Schuster, G. Schmid, *Adv. Energy Mater.* **2017**, *7*, 1602114.
- [9] T. T. H. Hoang, S. Ma, J. I. Gold, P. J. A. Kenis, A. A. Gewirth, *ACS Catal.* **2017**, *7*, 3313.
- [10] H. Jung, S. Y. Lee, C. W. Lee, M. K. Cho, D. H. Won, C. Kim, H. S. Oh, B. K. Min, Y. J. Hwang, *J. Am. Chem. Soc.* **2019**, *141*, 4624.
- [11] B. Zhang, J. Zhang, M. Hua, Q. Wan, Z. Su, X. Tan, L. Liu, F. Zhang, G. Chen, D. Tan, X. Cheng, B. Han, L. Zheng, G. Mo, *J. Am. Chem. Soc.* **2020**, *142*, 13606.
- [12] Z. Xu, T. Wu, Y. Cao, C. Chen, X. Zeng, P. Lin, W.-W. Zhao, *J. Catal.* **2020**, *383*, 42.
- [13] H. Mistry, A. S. Varela, C. S. Bonifacio, I. Zegkinoglou, I. Sinev, Y. W. Choi, K. Kisslinger, E. A. Stach, J. C. Yang, P. Strasser, B. R. Cuenya, *Nat. Commun.* **2016**, *7*, 12123.
